# Supplementary material for: Biomarkers of the L-Arginine/Dimethylarginine/Nitric Oxide Pathway in People with Chronic Airflow Obstruction and Obstructive Sleep Apnoea
Source: MDPI journal article supplement (doi:10.3390/jcm12165230), 2023-08-11
Supplement: s1 [file s1]

***Biomarkers of the L-arginine / dimethylarginine / nitric oxide pathway in people with chronic airflow obstruction and obstructive sleep apnoea***

Juliane Hannemann<sup>1,2#\*</sup>, Elin H. Thorarinnsdottir<sup>3,4#</sup>, André F.S. Amaral<sup>5,6</sup>, Edzard Schwedhelm<sup>1</sup>,  
Lena Schmidt-Hutten<sup>1</sup>, Heike Stang<sup>1</sup>, Bryndis Benediktsdottir<sup>4,7</sup>, Ingibjörg Gunnarsdottir<sup>8</sup>,  
Thorarinn Gislason<sup>4,7#</sup>, Rainer Böger<sup>1,2#</sup>

**SUPPLEMENTARY TABLES**

<sup>1</sup>Institute of Clinical Pharmacology and Toxicology, University Medical Center Hamburg-Eppendorf, Hamburg, Germany; <sup>2</sup>Institute DECIPHER, German-Chilean Institute for Research on Pulmonary Hypoxia and its Health Sequelae, Hamburg, Germany; <sup>3</sup>Primary Health Care of the Capital Area, Reykjavik, Iceland; <sup>4</sup> Faculty of Medicine, University of Iceland, Reykjavik, Iceland; <sup>5</sup>National Heart and Lung Institute, Imperial College London, London, U.K.; <sup>6</sup>NIHR Imperial Biomedical Research Centre, London, U.K.; <sup>7</sup>Sleep Department, Landspítali University Hospital of Iceland, Reykjavik, Iceland; <sup>8</sup>Unit for Nutrition Research, Landspítali University Hospital & Faculty of Food Science and Nutrition, University of Iceland, Reykjavik, Iceland.

**Table S1.** Chronic airflow obstruction, respiratory symptoms, and sleep-related symptoms in the study population by sex.

| Variable                                       | Total       | Female      | Male        | P*               |
|------------------------------------------------|-------------|-------------|-------------|------------------|
| <b>Chronic airflow obstruction<sup>1</sup></b> |             |             |             |                  |
| Yes                                            | 78 (10.9)   | 46 (13.7)   | 32 (8.5)    | <b>0.03</b>      |
| <b>Respiratory symptoms<sup>2</sup></b>        |             |             |             |                  |
| Chronic cough                                  | 82 (11.5)   | 41 (12.2)   | 41 (10.9)   | 0.58             |
| Chronic phlegm                                 | 67 (9.4)    | 28 (8.3)    | 39 (10.3)   | 0.36             |
| Wheezing                                       | 173 (24.3)  | 79 (23.5)   | 94 (24.9)   | 0.66             |
| <b>Sleepiness</b>                              |             |             |             |                  |
| Mean ESS score                                 | 6.1 ± 3.9   | 5.7 ± 3.9   | 6.4 ± 3.9   | <b>0.017</b>     |
| ESS > 10                                       | 94 (13.2)   | 40 (11.9)   | 54 (14.3)   | 0.34             |
| Daytime sleepiness<br>≥ 3 days/week            | 147 (20.8)  | 74 (22.2)   | 73 (19.5)   | 0.38             |
| Feeling rested < 1<br>time/week                | 99 (17.4)   | 46 (17.7)   | 53 (17.2)   | 0.88             |
| <b>OSA-related symptoms</b>                    |             |             |             |                  |
| Loud snoring<br>≥ 3 nights/week                | 134 (26.0)  | 33 (15.1)   | 101 (34.0)  | <b>&lt;0.001</b> |
| Observed apneas<br>≥ 1 night/week              | 46 (8.7)    | 9 (3.6)     | 37 (13.2)   | <b>&lt;0.001</b> |
| Nocturnal sweating ≥ 3<br>nights/week          | 76 (10.8)   | 41 (12.4)   | 35 (9.4)    | 0.21             |
| Nocturnal GER<br>≥ 1 night/week                | 40 (5.7)    | 21 (6.4)    | 19 (5.1)    | 0.46             |
| <b>MAP Index</b>                               |             |             |             |                  |
| Mean MAP Index                                 | 0.36 ± 0.23 | 0.21 ± 0.16 | 0.50 ± 0.19 | <b>&lt;0.001</b> |
| MAP > 0.5                                      | 215 (30.2)  | 24 (7.1)    | 191 (50.7)  | <b>&lt;0.001</b> |

Data are presented as mean ± standard deviation and as number of observations (n) with the percent value given in brackets. \*p values from chi-squared test (categorical) and Student's t test (continuous) comparing males with females. <sup>1</sup>Chronic airflow obstruction was defined as post-bronchodilator FEV1/FVC < lower limit of the normal range as described by [7]. <sup>2</sup>Chronic cough or phlegm was defined as positive if present for three months or more per year, wheezing was defined as positive if wheezing / whistling in the chest had been noted at any time during the preceding 12 months. Abbreviations: ESS, Epworth Sleepiness Scale; nGER, nocturnal gastroesophageal reflux; MAP, Multivariable Apnea Prediction Index; OSA, obstructive sleep apnea.

**Table S2.** Distribution of biomarkers of interest by age group and smoking status.

| Variable                           | Age (years)                |                            |                            |                            |                  | Smoking status             |                            |                            |                  |
|------------------------------------|----------------------------|----------------------------|----------------------------|----------------------------|------------------|----------------------------|----------------------------|----------------------------|------------------|
|                                    | 40-49<br>(n=232)           | 50-59<br>(n=220)           | 60-69<br>(n=139)           | ≥70<br>(n=122)             | p-value*         | Never<br>(n=278)           | Past<br>(n=302)            | Current<br>(n=131)         | p-value*         |
| ADMA,<br>median (IQR)              | 0.48 (0.42,<br>0.54)       | 0.50 (0.45,<br>0.55)       | 0.51 (0.46,<br>0.56)       | 0.54 (0.49,<br>0.59)       | <b>&lt;0.001</b> | 0.50<br>(0.44,<br>0.55)    | 0.51<br>(0.45,<br>0.57)    | 0.52<br>(0.46,<br>0.57)    | 0.16             |
| SDMA,<br>median (IQR)              | 0.47 (0.42,<br>0.54)       | 0.48 (0.44,<br>0.54)       | 0.51 (0.46,<br>0.60)       | 0.60 (0.51,<br>0.69)       | <b>&lt;0.001</b> | 0.50<br>(0.45,<br>0.58)    | 0.50<br>(0.45,<br>0.58)    | 0.46<br>(0.42,<br>0.54)    | <b>0.003</b>     |
| L-Arginine,<br>median (IQR)        | 137.2<br>(125.3,<br>158.6) | 149.9<br>(130.4,<br>164.5) | 146.2<br>(127.9,<br>166.5) | 140.7<br>(126.4,<br>162.0) | <b>0.008</b>     | 138.0<br>(123.9,<br>158.2) | 146.2<br>(129.0,<br>165.2) | 149.4<br>(134.5,<br>169.2) | <b>&lt;0.001</b> |
| L-Citrulline,<br>median (IQR)      | 36.6 (30.9,<br>43.3)       | 38.9 (32.5,<br>45.7)       | 41.8 (36.0,<br>49.6)       | 45.8 (38.4,<br>56.8)       | <b>&lt;0.001</b> | 39.7<br>(33.6,<br>47.3)    | 39.7<br>(32.3,<br>48.0)    | 39.0<br>(32.8,<br>46.7)    | 0.97             |
| L-Ornithine,<br>median (IQR)       | 75.9 (62.1,<br>91.0)       | 79.7 (68.4,<br>93.4)       | 81.0 (66.8,<br>96.7)       | 86.3 (75.5,<br>102.6)      | <b>&lt;0.001</b> | 79.1<br>(66.7,<br>92.5)    | 80.9<br>(67.3,<br>95.3)    | 81.4<br>(67.3,<br>99.5)    | 0.38             |
| Arg/ADMA<br>Ratio,<br>median (IQR) | 296.3<br>(252.6,<br>330.5) | 294.8<br>(262.6,<br>345.1) | 287.9<br>(250.2,<br>332.4) | 269.4<br>(240.8,<br>299.4) | <b>&lt;0.001</b> | 284.6<br>(248.6,<br>323.8) | 290.2<br>(255.4,<br>339.1) | 290.7<br>(259.0,<br>326.7) | 0.11             |
| Cit/Arg<br>Ratio,<br>median (IQR)  | 0.26 (0.22,<br>0.31)       | 0.26 (0.22,<br>0.32)       | 0.28 (0.23,<br>0.34)       | 0.32 (0.26,<br>0.40)       | <b>&lt;0.001</b> | 0.28<br>(0.24,<br>0.34)    | 0.27<br>(0.22,<br>0.33)    | 0.26<br>(0.22,<br>0.31)    | 0.05             |
| Orn/Arg<br>Ratio,<br>median (IQR)  | 0.52 (0.44,<br>0.66)       | 0.54 (0.45,<br>0.65)       | 0.55 (0.46,<br>0.65)       | 0.60 (0.52,<br>0.70)       | <b>0.0001</b>    | 0.57<br>(0.46,<br>0.67)    | 0.54<br>(0.46,<br>0.66)    | 0.53<br>(0.45,<br>0.65)    | 0.36             |

Data are presented as medians and inter quartile ranges. \*p-value from Kruskal-Wallis test. Abbreviations: ADMA, asymmetric dimethylarginine; Arg, L-arginine; BMI, body mass index; Cit, L-citrulline; Orn, L-ornithine; SDMA, symmetric dimethylarginine.



**Table S3.** Chronic airflow obstruction and/or obstructive sleep apnoea risk and biomarker concentrations among the study population stratified by BMI categories.

| Variable              | <20                     | 20.0-22.5               | 22.5-25                 | 25-27.5                 | 27.5-30                 | 30-32.5                 | 32.5-35                 | >35                     | p-value* |
|-----------------------|-------------------------|-------------------------|-------------------------|-------------------------|-------------------------|-------------------------|-------------------------|-------------------------|----------|
| N (%)                 | 13 (1.8)                | 57 (8.0)                | 131 (18.4)              | 167 (23.4)              | 145 (20.3)              | 97 (13.6)               | 50 (7.0)                | 53 (7.4)                | -        |
| Males (%)             | 4 (30.8)                | 18 (31.6)               | 57 (43.5)               | 95 (56.9)               | 93 (64.1)               | 58 (59.8)               | 29 (58.0)               | 23 (43.4)               | <0.001   |
| Age (years)           | 65 ± 13                 | 55 ± 12                 | 55 ± 11                 | 58 ± 13                 | 58 ± 12                 | 57 ± 11                 | 61 ± 11                 | 55 ± 9                  | 0.006    |
| MAP/CAO categories    |                         |                         |                         |                         |                         |                         |                         |                         |          |
| -MAP/-CAO             | 7 (53.9)                | 47 (82.5)               | 100 (76.3)              | 122 (73.1)              | 91 (62.8)               | 45 (46.4)               | 16 (32.0)               | 11 (20.8)               | <0.001   |
| -MAP/+CAO             | 6 (46.2)                | 9 (15.7)                | 19 (14.5)               | 14 (8.4)                | 5 (3.5)                 | 2 (2.1)                 | 3 (6.0)                 | 1 (1.9)                 |          |
| +MAP/-CAO             | 0 (0)                   | 0 (0)                   | 11 (8.4)                | 26 (15.6)               | 44 (30.4)               | 48 (49.5)               | 28 (56.0)               | 39 (73.6)               |          |
| +MAP/+CAO             | 0 (0)                   | 1 (1.8)                 | 1 (0.8)                 | 5 (3.0)                 | 5 (3.5)                 | 2 (2.1)                 | 3 (6.0)                 | 2 (3.8)                 |          |
| Biomarker levels      |                         |                         |                         |                         |                         |                         |                         |                         |          |
| ADMA (μmol/L)         | 0.52<br>(0.49, 0.58)    | 0.48<br>(0.45, 0.55)    | 0.51<br>(0.43, 0.57)    | 0.50<br>(0.44, 0.57)    | 0.50<br>(0.45, 0.55)    | 0.50<br>(0.44, 0.54)    | 0.52<br>(0.47, 0.55)    | 0.53<br>(0.48, 0.59)    | 0.092    |
| SDMA (μmol/L)         | 0.54<br>(0.48, 0.63)    | 0.49<br>(0.44, 0.55)    | 0.49<br>(0.45, 0.57)    | 0.52<br>(0.45, 0.60)    | 0.50<br>(0.45, 0.58)    | 0.51<br>(0.44, 0.55)    | 0.49<br>(0.44, 0.61)    | 0.47<br>(0.44, 0.50)    | 0.025    |
| L-Arginine (μmol/L)   | 142.9<br>(125.6, 159.7) | 135.9<br>(124.1, 158.0) | 141.0<br>(123.5, 163.2) | 142.5<br>(125.9, 164.1) | 144.0<br>(132.3, 163.1) | 150.1<br>(129.6, 167.6) | 147.1<br>(134.9, 161.2) | 147.8<br>(128.6, 178.8) | 0.336    |
| L-Citrulline (μmol/L) | 39.1<br>(31.4, 54.8)    | 37.7<br>(31.6, 46.3)    | 39.8<br>(32.9, 47.2)    | 39.2<br>(34.3, 47.2)    | 40.7<br>(33.9, 50.0)    | 37.4<br>(31.1, 44.4)    | 44.1<br>(33.3, 54.0)    | 39.3<br>(33.6, 48.4)    | 0.089    |
| L-Ornithine (μmol/L)  | 81.4<br>(61.6, 89.9)    | 70.9<br>(61.3, 88.4)    | 78.9<br>(65.9, 93.6)    | 85.0<br>(70.7, 98.1)    | 79.7<br>(67.4, 95.4)    | 76.8<br>(66.8, 91.5)    | 83.8<br>(66.4, 95.3)    | 85.5<br>(75.7, 102.0)   | 0.004    |
| Arg / ADMA Ratio      | 275.0<br>(236.5, 295.9) | 282.8<br>(253.7, 312.9) | 293.8<br>(247.3, 334.6) | 277.1<br>(246.2, 323.8) | 295.1<br>(259.5, 333.2) | 303.3<br>(264.5, 335.7) | 294.1<br>(259.7, 328.7) | 281.3<br>(244.0, 330.2) | 0.128    |
| Cit / Arg Ratio       | 0.26<br>(0.23, 0.40)    | 0.28<br>(0.23, 0.35)    | 0.27<br>(0.23, 0.33)    | 0.29<br>(0.24, 0.33)    | 0.28<br>(0.23, 0.33)    | 0.24<br>(0.21,0.30)     | 0.30<br>(0.22,0.38)     | 0.27<br>(0.23, 0.32)    | 0.016    |
| Orn / Arg Ratio       | 0.55<br>(0.47, 0.60)    | 0.53<br>(0.46, 0.64)    | 0.55<br>(0.44, 0.66)    | 0.58<br>(49, 0.71)      | 0.53<br>(0.46, 0.66)    | 0.50<br>(0.44, 0.62)    | 0.56<br>(0.47, 0.67)    | 0.59<br>(0.49, 0.74)    | 0.012    |

Data are presented as mean ± standard deviation or as median with interquartile ranges in square brackets for continuous variables as appropriate. Categorical variables are presented as number of observations (N) with the percent value given in brackets. \*p values from Student's t test for means, Kruskal-Wallis test for medians (continuous) and Chi-square test (categorical). Abbreviations: ADMA, asymmetric dimethylarginine; Arg, L-arginine; BMI, body mass index; CAO, Chronic airflow obstruction, Cit, L-citrulline; CVD, cardiovascular disease; MAP, Multivariable apnea prediction index, Orn, L-ornithine; SDMA, symmetric dimethylarginine.

**Table S4.** Distribution of biomarkers of interest based on the presence or absence of hypertension, cardiovascular disease and diabetes.

|                              | Hypertension         |                      |                  | Cardiovascular disease |                      |                  | Diabetes             |                      |             |
|------------------------------|----------------------|----------------------|------------------|------------------------|----------------------|------------------|----------------------|----------------------|-------------|
|                              | Yes<br>(n=177)       | No<br>(n=524)        | p-<br>value*     | Yes<br>(n=106)         | No<br>(n=606)        | p-value*         | Yes<br>(n=20)        | No<br>(n=689)        | p-value*    |
| ADMA, median (IQR)           | 0.52 (0.46, 0.58)    | 0.50 (0.44, 0.55)    | <b>0.02</b>      | 0.50 (0.46, 0.58)      | 0.51 (0.44, 0.56)    | 0.24             | 0.51 (0.43, 0.61)    | 0.51 (0.45, 0.56)    | 0.79        |
| SDMA, median (IQR)           | 0.53 (0.46, 0.62)    | 0.49 (0.44, 0.56)    | <b>&lt;0.001</b> | 0.54 (0.49, 0.64)      | 0.49 (0.44, 0.56)    | <b>&lt;0.001</b> | 0.51 (0.47, 0.63)    | 0.50 (0.44, 0.57)    | 0.08        |
| L-Arginine, median (IQR)     | 144.5 (130.0, 164.0) | 143.3 (126.3, 162.8) | 0.42             | 142.9 (125.3, 164.1)   | 144.2 (127.7, 163.2) | 0.28             | 140.0 (129.4, 156.8) | 144.4 (126.6, 163.2) | 0.82        |
| L-Citrulline, median (IQR)   | 42.8 (35.8, 52.0)    | 38.4 (32.0, 46.1)    | <b>&lt;0.001</b> | 45.2 (36.0, 54.3)      | 39.0(32.5, 46.1)     | <b>&lt;0.001</b> | 29.2 (22.0, 43.5)    | 39.6 (33.4, 47.4)    | <b>0.01</b> |
| L-Ornithine, median (IQR)    | 83.5 (67.3, 96.4)    | 79.8 (66.8, 94.7)    | 0.29             | 85.5 (67.1, 101.2)     | 79.7 (66.8, 94.2)    | 0.11             | 83.9 (769.0, 87.8)   | 80.3 (66.8, 95.3)    | 0.95        |
| Arg/ADMA Ratio, median (IQR) | 285.0 (252.3, 327.8) | 289.5(251.3, 333.5)  | 0.40             | 284.6 (240.8, 321.1)   | 289.7 (253.4, 333.4) | 0.08             | 284.6 (250.3, 315.2) | 288.7 (251.3, 330.2) | 0.50        |
| Cit/Arg Ratio, median (IQR)  | 0.29 (0.24, 0.35)    | 0.27 (0.22, 0.32)    | <b>&lt;0.001</b> | 0.30 (0.25, 0.38)      | 0.27 (0.22, 0.32)    | <b>&lt;0.001</b> | 0.22 (0.17, 0.30)    | 0.27 (0.23, 0.33)    | <b>0.01</b> |
| Orn/Arg Ratio, median (IQR)  | 0.55 (0.47, 0.68)    | 0.55 (0.46, 0.66)    | 0.57             | 0.58 (0.49, 0.68)      | 0.55 (0.45, 0.66)    | <b>0.03</b>      | 0.56 (0.49, 0.66)    | 0.55 (0.46, 0.67)    | 0.79        |

Data are presented as medians and inter quartile ranges. \*p-value from Kruskal-Wallis test. Abbreviations: ADMA, asymmetric dimethylarginine; Arg, L-arginine; Cit, L-citrulline; Orn, L-ornithine; SDMA, symmetric dimethylarginine.

**Table S5.** Association of chronic airflow obstruction with biomarkers of interest. Model 1: Unadjusted. Model 2: Adjusted for age, sex and smoking status. Model 3: Model 2+BMI. Model 4: Model 2+eGFR.

| ADMA quartile                | Concentration in uM        | N   | Model 1<br>OR (95% CI) | p            | Model 2<br>OR (95% CI) | p            | Model 3<br>OR (95% CI) | p    | Model 4<br>OR (95% CI) | p            |
|------------------------------|----------------------------|-----|------------------------|--------------|------------------------|--------------|------------------------|------|------------------------|--------------|
| 1                            | 0.2965-0.4475              | 179 | 1 (Ref)                |              | 1 (Ref)                |              | 1 (Ref)                |      | 1 (Ref)                |              |
| 2                            | 0.4480-0.5065              | 178 | 0.90 (0.45-1.77)       | 0.74         | 0.70 (0.34-1.43)       | 0.33         | 0.69 (0.34-1.42)       | 0.32 | 0.70 (0.34-1.42)       | 0.32         |
| 3                            | 0.5065-0.5590              | 179 | 0.83 (0.41-1.66)       | 0.59         | 0.58 (0.28-1.21)       | 0.15         | 0.65 (0.31-1.36)       | 0.25 | 0.58 (0.28-1.21)       | 0.15         |
| 4                            | 0.5600-1.1335              | 177 | 1.45 (0.77-2.73)       | 0.25         | 0.94 (0.48-1.84)       | 0.86         | 0.98 (0.50-1.94)       | 0.96 | 0.94 (0.48-1.84)       | 0.85         |
| <b>SDMA quartile</b>         | <b>Concentration in uM</b> |     |                        |              |                        |              |                        |      |                        |              |
| 1                            | 0.2950-0.4425              | 180 | 1 (Ref)                |              | 1 (Ref)                |              | 1 (Ref)                |      | 1 (Ref)                |              |
| 2                            | 0.4435-0.4980              | 179 | 1.16 (0.55-2.46)       | 0.69         | 1.20 (0.56-2.59)       | 0.64         | 1.24 (0.57-2.70)       | 0.59 | 1.23 (0.57-2.66)       | 0.61         |
| 3                            | 0.499-0.5740               | 176 | 1.10 (0.52-2.36)       | 0.80         | 1.10 (0.50-2.41)       | 0.82         | 1.05 (0.47-2.32)       | 0.91 | 1.13 (0.51-2.51)       | 0.76         |
| 4                            | 0.5750-1.8515              | 178 | 2.70 (1.39-5.24)       | <b>0.003</b> | 2.10 (1.00-4.37)       | <b>0.049</b> | 1.99 (0.94-4.21)       | 0.07 | 2.24 (1.03-4.89)       | <b>0.042</b> |
| <b>L-Arginine quartile</b>   | <b>Concentration in uM</b> |     |                        |              |                        |              |                        |      |                        |              |
| 1                            | 65.705-126.905             | 179 | 1 (Ref)                |              | 1 (Ref)                |              | 1 (Ref)                |      | 1 (Ref)                |              |
| 2                            | 126.958-144.036            | 178 | 0.70 (0.36-1.39)       | 0.31         | 0.63 (0.31-1.27)       | 0.19         | 0.68 (0.33-1.38)       | 0.28 | 0.63 (0.31-1.27)       | 0.19         |
| 3                            | 144.072-163.145            | 178 | 0.85 (0.44-1.64)       | 0.63         | 0.77 (0.39-1.51)       | 0.44         | 0.84 (0.42-1.68)       | 0.63 | 0.77 (0.39-1.51)       | 0.44         |
| 4                            | 163.273-279.045            | 178 | 0.95 (0.50-1.81)       | 0.89         | 0.81 (0.41-1.57)       | 0.53         | 0.92 (0.47-1.82)       | 0.82 | 0.80 (0.41-1.56)       | 0.51         |
| <b>L-Citrulline quartile</b> | <b>Concentration in uM</b> |     |                        |              |                        |              |                        |      |                        |              |
| 1                            | 15.515-33.009              | 179 | 1 (Ref)                |              | 1 (Ref)                |              | 1 (Ref)                |      | 1 (Ref)                |              |
| 2                            | 33.054-39.521              | 178 | 0.76 (0.37-1.59)       | 0.47         | 0.67 (0.32-1.41)       | 0.29         | 0.67 (0.29-1.33)       | 0.22 | 0.67 (0.32-1.42)       | 0.29         |
| 3                            | 39.527-47.328              | 178 | 1.26 (0.65-2.44)       | 0.49         | 1.03 (0.52-2.05)       | 0.93         | 1.06 (0.53-2.12)       | 0.95 | 1.03 (0.51-2.04)       | 0.94         |
| 4                            | 47-406-132.089             | 178 | 1.39 (0.73-2.67)       | 0.32         | 0.88 (0.43-1.77)       | 0.71         | 0.88 (0.43-1.80)       | 0.47 | 0.86 (0.42-1.76)       | 0.69         |
| <b>L-Ornithine quartile</b>  | <b>Concentration in uM</b> |     |                        |              |                        |              |                        |      |                        |              |
| 1                            | 33.585-66.966              | 179 | 1 (Ref)                |              | 1 (Ref)                |              | 1 (Ref)                |      | 1 (Ref)                |              |
| 2                            | 67.066-80.412              | 178 | 0.72 (0.37-1.39)       | 0.33         | 0.59 (0.30-1.18)       | 0.14         | 0.63 (0.31-1.426)      | 0.19 | 0.59 (0.30-1.18)       | 0.14         |
| 3                            | 80.436-95.332              | 178 | 0.72 (0.37-1.39)       | 0.33         | 0.57 (0.29-1.16)       | 0.12         | 0.63 (0.31-1.28)       | 0.20 | 0.57 (0.28-1.15)       | 0.12         |
| 4                            | 95.339-280.306             | 178 | 0.91 (0.48-1.71)       | 0.76         | 0.62 (0.32-1.21)       | 0.16         | 0.68 (0.34-1.34)       | 0.27 | 0.62 (0.32-1.21)       | 0.16         |
| <b>Arg/ADMA quartile</b>     | <b>Ratio</b>               |     |                        |              |                        |              |                        |      |                        |              |
| 1                            | 74.2429-251.197            | 179 | 1 (Ref)                |              | 1 (Ref)                |              | 1 (Ref)                |      | 1 (Ref)                |              |
| 2                            | 251.326-288.691            | 178 | 0.68 (0.35-1.32)       | 0.26         | 0.60 (0.30-1.19)       | 0.14         | 0.55 (0.27-1.10)       | 0.09 | 0.60 (0.30-1.19)       | 0.14         |
| 3                            | 288.877-330.143            | 178 | 0.64 (0.33-1.25)       | 0.19         | 0.66 (0.33-1.32)       | 0.24         | 0.68 (0.33-1.37)       | 0.28 | 0.66 (0.33-1.32)       | 0.24         |
| 4                            | 330.197-532.619            | 178 | 0.86 (0.46-1.62)       | 0.65         | 1.02 (0.53-1.98)       | 0.94         | 1.01 (0.52-1.98)       | 0.97 | 1.02 (0.53-1.98)       | 0.95         |
| <b>Cit/Arg quartile</b>      | <b>Ratio</b>               |     |                        |              |                        |              |                        |      |                        |              |
| 1                            | 0.083-0.2268               | 179 | 1 (Ref)                |              | 1 (Ref)                |              | 1 (Ref)                |      | 1 (Ref)                |              |
| 2                            | 0.2274-0.2732              | 178 | 1.07 (0.53-2.15)       | 0.85         | 1.13 (0.55-2.30)       | 0.74         | 1.03 (0.50-2.12)       | 0.94 | 1.13 (0.55-2.32)       | 0.73         |
| 3                            | 0.2734-0.3279              | 178 | 1.34 (0.69-2.63)       | 0.39         | 1.26 (0.63-2.53)       | 0.51         | 1.17 (0.58-2.37)       | 0.66 | 1.27 (0.63-2.55)       | 0.50         |
| 4                            | 0.3291-0.8897              | 178 | 1.27 (0.65-2.51)       | 0.48         | 0.93 (0.45-1.91)       | 0.45         | 0.83 (0.40-1.72)       | 0.61 | 0.92 (0.45-1.89)       | 0.82         |
| <b>Orn/Arg quartile</b>      | <b>Ratio</b>               |     |                        |              |                        |              |                        |      |                        |              |
| 1                            | 0.2392-0.4580              | 179 | 1 (Ref)                |              | 1 (Ref)                |              | 1 (Ref)                |      | 1 (Ref)                |              |
| 2                            | 0.4582-0.5523              | 178 | 1.29 (0.64-2.58)       | 0.47         | 1.03 (0.50-2.11)       | 0.93         | 1.06 (0.52-2.18)       | 0.88 | 1.03 (0.51-2.12)       | 0.93         |
| 3                            | 0.5529-0.6666              | 178 | 1.59 (0.81-3.10)       | 0.18         | 1.23 (0.61-2.47)       | 0.56         | 1.19 (0.59-2.42)       | 0.62 | 1.23 (0.61-2.48)       | 0.56         |
| 4                            | 0.6678-1.8134              | 178 | 1.15 (0.56-2.33)       | 0.71         | 0.90 (0.43-1.89)       | 0.78         | 0.93 (0.44-1.97)       | 0.85 | 0.90 (0.43-1.89)       | 0.78         |

Data are presented as odds ratios and 95% confidence intervals with subjects without chronic airflow obstruction as reference. Abbreviations: ADMA, asymmetric dimethylarginine; Arg, L-arginine; CI, confidence interval; Cit, L-citrulline; OR, Odds ratio; Orn, L-ornithine; SDMA, symmetric dimethylarginine.



**Table S6.** Distribution of biomarkers of interest based on the presence or absence of sleepiness.

|                | Epworth sleepiness scale |                         |          | Feeling sleepy           |                         |              | Feeling rested          |                       |              |
|----------------|--------------------------|-------------------------|----------|--------------------------|-------------------------|--------------|-------------------------|-----------------------|--------------|
|                | ESS score ≤10<br>(n=619) | ESS score >10<br>(n=94) | p-value* | <3 times/week<br>(n=560) | ≥3 days/week<br>(n=147) | p-value*     | >1 days/week<br>(n=469) | <1 day/week<br>(n=99) | p-value*     |
| ADMA           | 0.51 (0.45, 0.56)        | 0.50 (0.45, 0.55)       | 0.567    | 0.50 (0.44, 0.55)        | 0.53 (0.46, 0.58)       | <b>0.004</b> | 0.51 (0.44, 0.56)       | 0.53 (0.46, 0.59)     | 0.052        |
| SDMA           | 0.50 (0.44, 0.58)        | 0.50 (0.44, 0.54)       | 0.229    | 0.49 (0.44, 0.56)        | 0.51 (0.46, 0.60)       | <b>0.007</b> | 0.50 (0.44, 0.58)       | 0.51 (0.46, 0.60)     | 0.137        |
| L-Arginine     | 143.5 (126.4, 163.5)     | 146.7 (131.9, 161.7)    | 0.338    | 144.5 (127.8, 162.5)     | 142.4 (126.1, 166.0)    | 0.966        | 142.2 (126.1, 161.6)    | 150.7 (132.6, 172.9)  | <b>0.031</b> |
| L-Citrulline   | 39.6 (33.3, 47.7)        | 39.1 (31.4, 46.7)       | 0.476    | 39.7 (32.9, 47.4)        | 38.9 (32.9, 48.4)       | 0.949        | 40.1 (33.3, 48.0)       | 39.4 (33.9, 48.4)     | 0.803        |
| L-Ornithine    | 80.4 (66.8, 95.3)        | 80.5 (69.2, 95.0)       | 0.809    | 79.8 (66.8, 95.2)        | 81.4 (67.1, 95.5)       | 0.540        | 80.4 (67.3, 95.3)       | 81.4 (68.1, 97.2)     | 0.675        |
| Arg/ADMA Ratio | 287.1 (250.6, 328.8)     | 298.1 (255.9, 342.4)    | 0.251    | 289.7 (255.6, 333.8)     | 280.0 (240.0, 324.6)    | 0.052        | 288.3 (250.4, 325.8)    | 289.0 (250.9, 329.6)  | 0.634        |
| Cit/Arg Ratio  | 0.27 (0.23, 0.33)        | 0.27 (0.22, 0.32)       | 0.218    | 0.27 (0.23, 0.33)        | 0.27 (0.23, 0.33)       | 0.921        | 0.28 (0.23, 0.33)       | 0.26 (0.22, 0.33)     | 0.254        |
| Cit/Orn Ratio  | 0.515 (0.46, 0.67)       | 0.55 (0.45, 0.66)       | 0.473    | 0.55 (0.46, 0.67)        | 0.56 (0.46, 0.66)       | 0.687        | 0.56 (0.47, 0.67)       | 0.54 (0.45, 0.67)     | 0.374        |

Data are presented as medians and inter quartile ranges. \*p-value from Kruskal-Wallis test. Abbreviations: ADMA, asymmetric dimethylarginine; Arg, L-arginine; Cit, L-citrulline; ESS, Epworth sleepiness scale; Orn, L-ornithine; SDMA, symmetric dimethylarginine.

**Table S7.** Association of high obstructive sleep apnoea risk as assessed by the MAP index  $\geq 0.5$  with quartiles of biomarkers of interest.

Model 1: Unadjusted. Model 2: Adjusted for eGFR

| ADMA quartile         | Concentration ( $\mu\text{mol/L}$ ) | N   | Model 1 OR (95% CI) | p-value      | Model 2 OR (95% CI) | p-value      |
|-----------------------|-------------------------------------|-----|---------------------|--------------|---------------------|--------------|
| 1                     | 0.2965-0.4475                       | 179 | 1 (Ref)             |              | 1 (Ref)             |              |
| 2                     | 0.4480-0.5065                       | 178 | 1.07 (0.66, 1.72)   | 0.785        | 1.06 (0.66, 1.71)   | 0.806        |
| 3                     | 0.5065-0.5590                       | 179 | 1.50 (0.95, 2.38)   | 0.082        | 1.49 (0.94, 2.36)   | 0.089        |
| 4                     | 0.5600-1.1335                       | 177 | 1.65 (1.04, 2.60)   | <b>0.033</b> | 1.63 (1.03, 2.58)   | <b>0.037</b> |
| SDMA quartile         | Concentration ( $\mu\text{mol/L}$ ) |     |                     |              |                     |              |
| 1                     | 0.2950-0.4425                       | 180 | 1 (Ref)             |              | 1 (Ref)             |              |
| 2                     | 0.4435-0.4980                       | 179 | 1.54 (0.96, 2.47)   | 0.070        | 1.57 (0.98, 2.51)   | 0.063        |
| 3                     | 0.499-0.5740                        | 176 | 1.35 (0.83, 2.17)   | 0.224        | 1.38 (0.85, 2.25)   | 0.190        |
| 4                     | 0.5750-1.8515                       | 178 | 2.10 (1.32, 3.32)   | <b>0.002</b> | 2.23 (1.35, 3.69)   | <b>0.002</b> |
| L-Arginine quartile   | Concentration ( $\mu\text{mol/L}$ ) |     |                     |              |                     |              |
| 1                     | 65.705-126.905                      | 179 | 1 (Ref)             |              | 1 (Ref)             |              |
| 2                     | 126.958-144.036                     | 178 | 1.13 (0.71, 1.80)   | 0.612        | 1.13 (0.71, 1.80)   | 0.609        |
| 3                     | 144.072-163.145                     | 178 | 1.32 (0.84, 2.09)   | 0.231        | 1.33 (0.84, 2.10)   | 0.228        |
| 4                     | 163.273-279.045                     | 178 | 1.43 (0.91, 2.25)   | 0.125        | 1.342 (0.90, 2.24)  | 0.132        |
| L-Citrulline quartile | Concentration ( $\mu\text{mol/L}$ ) |     |                     |              |                     |              |
| 1                     | 15.515-33.009                       | 179 | 1 (Ref)             |              | 1 (Ref)             |              |
| 2                     | 33.054-39.521                       | 178 | 1.10 (0.67, 1.74)   | 0.698        | 1.10 (0.69, 1.74)   | 0.701        |
| 3                     | 39.527-47.328                       | 178 | 1.10 (0.69, 1.74)   | 0.698        | 1.09 (0.69, 1.74)   | 0.707        |
| 4                     | 47-406-132.089                      | 178 | 1.57 (1.00, 2.46)   | <b>0.049</b> | 1.56 (0.98, 2.48)   | 0.059        |
| L-Ornithine quartile  | Concentration ( $\mu\text{mol/L}$ ) |     |                     |              |                     |              |
| 1                     | 33.585-66.966                       | 179 | 1 (Ref)             |              | 1 (Ref)             |              |
| 2                     | 67.066-80.412                       | 178 | 1.13 (0.70, 1.83)   | 0.604        | 1.13 (0.70, 1.82)   | 0.615        |
| 3                     | 80.436-95.332                       | 178 | 1.90 (1.21, 3.01)   | <b>0.006</b> | 1.90 (1.23, 3.00)   | <b>0.006</b> |
| 4                     | 95.339-280.306                      | 178 | 1.53 (0.96, 2.43)   | 0.073        | 1.52 (0.95, 2.42)   | 0.079        |
| Arg/ADMA quartile     | Ratio                               |     |                     |              |                     |              |
| 1                     | 74.2429-251.197                     | 179 | 1 (Ref)             |              | 1 (Ref)             |              |
| 2                     | 251.326-288.691                     | 178 | 0.50 (0.32, 0.81)   | <b>0.004</b> | 0.50 (0.32, 0.81)   | <b>0.004</b> |
| 3                     | 288.877-330.143                     | 178 | 0.82 (0.53, 1.28)   | 0.391        | 0.82 (0.53, 1.28)   | 0.388        |

|                         |                 |     |                   |              |                   |              |
|-------------------------|-----------------|-----|-------------------|--------------|-------------------|--------------|
| 4                       | 330.197-532.619 | 178 | 0.82 (0.53, 1.28) | 0.391        | 0.83 (0.53, 1.29) | 0.402        |
| <b>Cit/Arg quartile</b> | <b>Ratio</b>    |     |                   |              |                   |              |
| 1                       | 0.083-0.2268    | 179 | 1 (Ref)           |              | 1 (Ref)           |              |
| 2                       | 0.2274-0.2732   | 178 | 0.47 (0.28, 0.75) | <b>0.002</b> | 0.47 (0.29, 0.75) | <b>0.002</b> |
| 3                       | 0.2734-0.3279   | 178 | 0.94 (0.60, 1.44) | 0.605        | 0.93 (0.60, 1.45) | 0.760        |
| 4                       | 0.3291-0.8897   | 178 | 0.85 (0.54, 1.31) | 0.544        | 0.83 (0.53, 1.30) | 0.414        |
| <b>Orn/Arg quartile</b> | <b>Ratio</b>    |     |                   |              |                   |              |
| 1                       | 0.2392-0.4580   | 179 | 1 (Ref)           |              | 1 (Ref)           |              |
| 2                       | 0.4582-0.5523   | 178 | 1.53 (0.96, 2.43) | 0.073        | 1.52 (0.96, 2.42) | 0.076        |
| 3                       | 0.5529-0.6666   | 178 | 1.65 (1.04, 2.62) | <b>0.034</b> | 1.64 (1.03, 2.60) | <b>0.037</b> |
| 4                       | 0.6678-1.8134   | 178 | 1.34 (0.84, 2.15) | 0.221        | 1.33 (0.83, 2.14) | 0.229        |

Data are presented as odds ratios and 95% confidence intervals with subjects MAP index <0.5 as reference. Abbreviations: ADMA, asymmetric dimethylarginine; Arg, L-arginine; CI, confidence interval; Cit, L-citrulline; OR, Odds ratio; Orn, L-ornithine; SDMA, symmetric dimethylarginine.
